# Supplementary material for: Beclin-1 expression is retained in high-grade serous ovarian cancer yet is not essential for autophagy induction in vitro
Source: Springer Nature journal article supplement (doi:10.1186/s13048-015-0182-y), 2015-08-03
Supplement: MOESM1 [file 9778650]

**Supplementary Table 1: Summary of ovarian cancer patient clinical data**

| <b>Identifier</b> | <b>Age</b> | <b>Primary Tumor Histological Subtype</b>                                | <b>Grade</b> | <b>Stage</b> |
|-------------------|------------|--------------------------------------------------------------------------|--------------|--------------|
| EOC27             | 77         | Serous adenocarcinoma                                                    | High         | III          |
| EOC30             | 81         | Serous adenocarcinoma                                                    | High         | IIIC         |
| EOC31             | 46         | Serous adenocarcinoma                                                    | High         | IIIC         |
| EOC33             | 79         | Serous adenocarcinoma                                                    | High         | IIIC         |
| EOC35             | 81         | Serous adenocarcinoma                                                    | High         | IIIC         |
| EOC39             | 66         | Serous adenocarcinoma                                                    | High         | IIIC         |
| EOC59             | 47         | Serous adenocarcinoma                                                    | High         | IV           |
| EOC65             | 67         | Serous adenocarcinoma                                                    | High         | IIIC         |
| EOC67             | 51         | Serous adenocarcinoma                                                    | High         | IIIC         |
| EOC81             | 69         | Ovarian mucinous borderline tumor                                        | n.a.         | IIB          |
| EOC87             | 47         | Serous adenocarcinoma                                                    | High         | IV           |
| EOC89             | 56         | Serous and clear cell differentiation                                    | High         | IV           |
| EOC98             | 51         | Serous adenocarcinoma                                                    | High         | IIIC         |
| EOC100            | 65         | Serous (>90%) and endometrioid (<10%) adenocarcinoma                     | High         | IIIA         |
| EOC118            | 57         | Serous adenocarcinoma                                                    | High         | IIIC         |
| EOC122            | 56         | Serous carcinoma                                                         | High         | IIIC         |
| EOC129            | 74         | Serous carcinoma                                                         | High         | IIIC         |
| EOC136            | 42         | Serous ovarian carcinoma                                                 | High         | IV           |
| EOC155            | 66         | Serous adenocarcinoma                                                    | High         | IIIC         |
| EOC161            | 67         | Serous carcinoma                                                         | High         | IIIC         |
| EOC166            | 64         | Serous adenocarcinoma                                                    | High         | IIIC         |
| EOC168†           | 77         | Serous (70%) and clear cell (30%) adenocarcinoma                         | High         | IIIC         |
| EOC171            | 65         | Serous carcinoma                                                         | High         | IIIC         |
| iOvCa147          | 43         | Serous (70%) and clear cell (30%) adenocarcinoma                         | High         | IIC          |
| iOvCa168          | 77         | Serous (70%) and clear cell (30%) adenocarcinoma                         | High         | IIIC         |
| iOvCa170†         | 77         | Serous (70%) and clear cell (30%) adenocarcinoma                         | High         | IIIC         |
| iOvCa182          | 58         | Serous adenocarcinoma                                                    | High         | IIB          |
| iOvCa185          | 78         | Carcinosarcoma with serous, endometrioid, and clear cell differentiation | High         | IV           |
| iOvCa198          | 65         | Serous adenocarcinoma                                                    | High         | IIB          |
| iOvCa201          | 76         | Serous adenocarcinoma                                                    | High         | IIC          |
| iOvCa205          | 73         | Serous adenocarcinoma                                                    | High         | IIB          |

n.a., not available
